# Supplementary material
Source: Springer Nature journal article supplement (https://www.springermedizin.de/resource/supplementary/12958_2003_9_MOESM9_ESM.pdf/9566378)

# BMPR-II

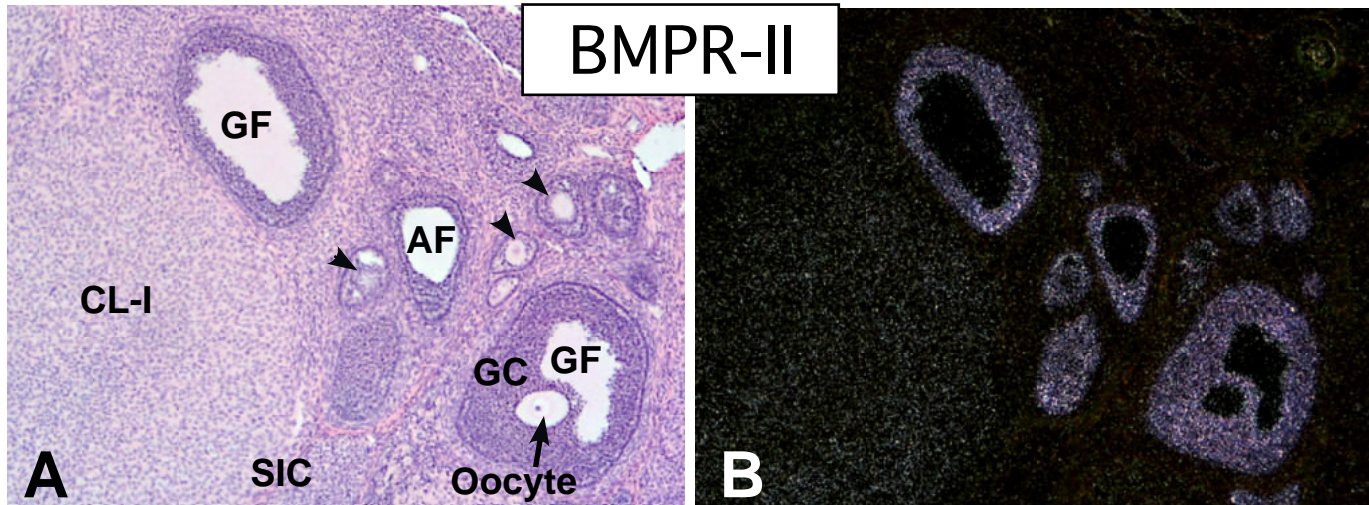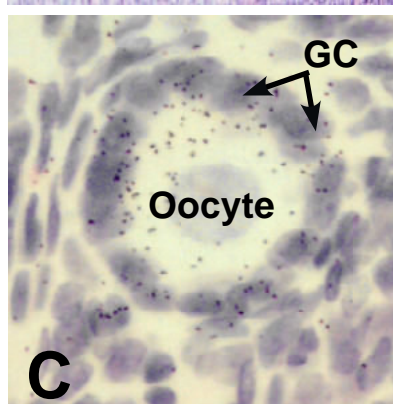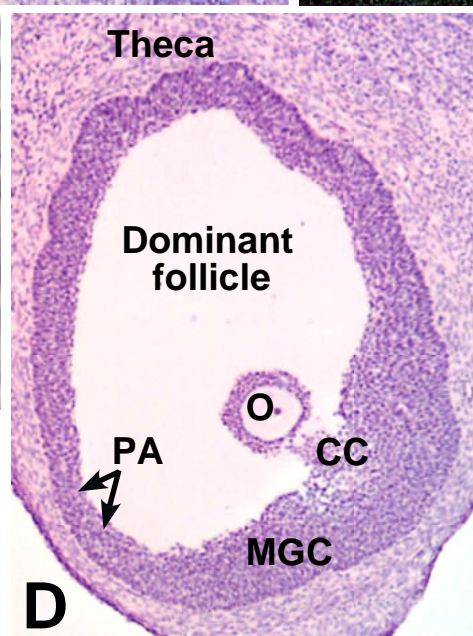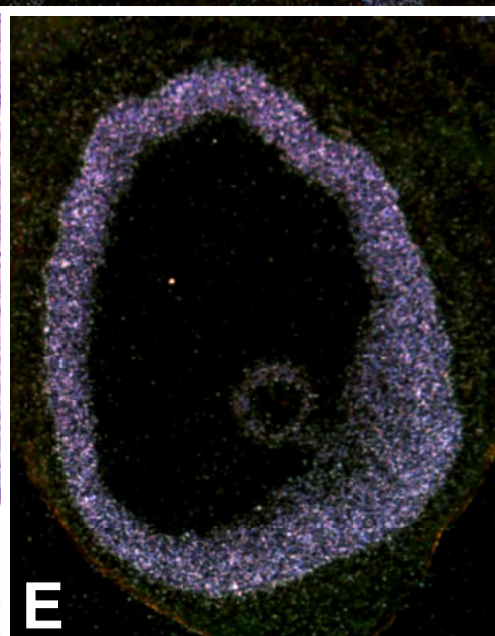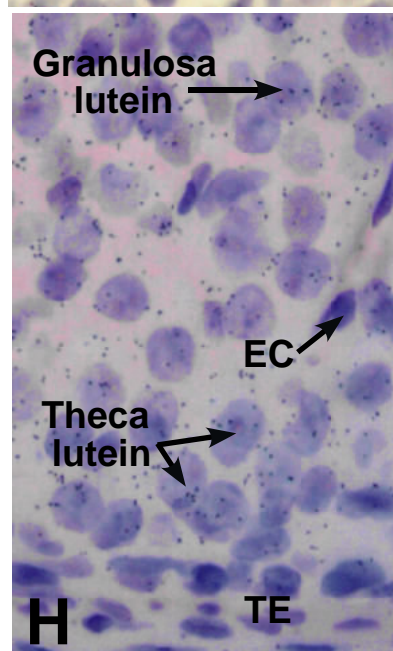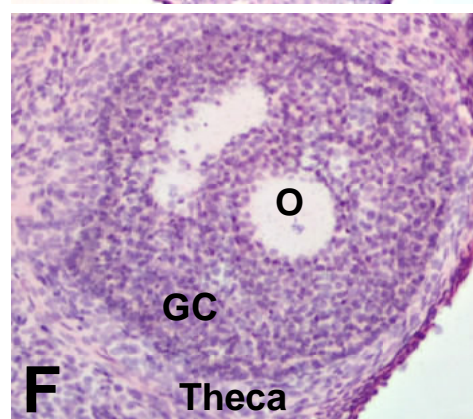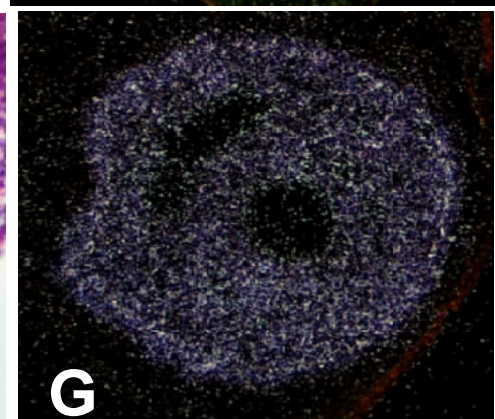

Supplement: MOESM9 [file 9566378]
